# Supplementary material for: Deciphering the Interactions of Bioactive Compounds in Selected Traditional Medicinal Plants against Alzheimer’s Diseases via Pharmacophore Modeling, Auto-QSAR, and Molecular Docking Approaches
Source: PubMed Central journal article supplement (PMC8037217; doi:10.3390/molecules26071996), 2021-04-01
Supplement: molecules-26-01996-s001.pdf [file molecules-26-01996-s001.pdf]

# Deciphering the Interactions of Bioactive Compounds in Selected Traditional Medicinal plants against Alzheimer's diseases via Pharmacophore modeling, Auto-QSAR, and Molecular Docking Approaches

Oluwafemi Adeleke Ojo<sup>1\*</sup>, Adebola Busola Ojo<sup>2</sup>, Charles Okolie<sup>3</sup>, Mary-Ann Chinyere Nwakama <sup>1</sup>, Matthew Iyobhebhe <sup>1</sup>, Ikponmwosa Owen Evbuomwan<sup>3</sup>, Charles Obiora Nwonuma<sup>1</sup>, Rotdelmwa Filibus Maimako<sup>1</sup>, Abayomi Emmanuel Adegboyega<sup>4</sup>, Odunayo Anthonia Taiwo<sup>5</sup> Khalaf F. Alsharif<sup>6</sup> and Gaber El-Saber Batiha<sup>7</sup>

<sup>1</sup> Medicinal Biochemistry and Biochemical Toxicology Group, Department of Biochemistry, Landmark University, Omu-Aran, PMB 1001, Kwara State, Nigeria; charles.okolie@lmu.edu.ng (C.O); adamaryann62@gmail.com (M-A.C.N); iyobhebhematthew@gmail.com (M.I); nwonuma.charles@lmu.edu.ng (C.O.N); maimako.rotdelmwa@lmu.edu.ng (R.F.M).

<sup>2</sup> Department of Biochemistry, Faculty of Sciences, Ekiti State University, Ado-Ekiti, Nigeria; adebolajo04@gmail.com.

<sup>3</sup> Department of Microbiology, Landmark University, Omu-Aran, PMB 1001, Kwara State, Nigeria

<sup>4</sup> Department of Biochemistry, Faculty of Basic Medical Science, University of Jos, Jos, Nigeria; abayomiadegboyega5@gmail.com

<sup>5</sup> Department of Biochemistry, Chrisland University, Abeokuta, Nigeria; odunayotaiwo25@gmail.com

<sup>6</sup> Department of Clinical Laboratory Sciences. College of Applied Medical Sciences, Taif University, P.O.Box 11099, Taif 21944, Saudi Arabia; alsharif@tu.edu.sa.

<sup>7</sup> Department of Pharmacology and Therapeutics, Faculty of Veterinary Medicine, Damanhour University, Damanhour 22511, AlBeheira, Egypt; gaberbatih@gmail.com

\* Correspondence: (OAO) ojo.adeleke@lmu.edu.ng; Phone no: +2347037824647

**Table S1.** Report for Numeric Model kpls\_radial\_17 (AChE)

| ID | SetY  | (Obs)  | Y(Pred) | Error   | Name        |
|----|-------|--------|---------|---------|-------------|
| 1  | train | 6.8300 | 6.6067  | -0.2233 | Compound 1  |
| 2  | test  | 4.1700 | 4.4405  | 0.2705  | Compound 3  |
| 3  | train | 4.1700 | 4.4405  | 0.2705  | Compound 3  |
| 4  | test  | 6.1000 | 6.0081  | -0.0919 | Compound 4  |
| 5  | train | 4.6800 | 4.7946  | 0.1146  | Compound 5  |
| 6  | train | 4.6800 | 4.8012  | 0.1212  | Compound 5  |
| 7  | train | 6.4100 | 6.3914  | -0.0186 | Compound 9  |
| 8  | train | 5.0100 | 5.0143  | 0.0043  | Compound 10 |
| 9  | test  | 5.0100 | 5.0143  | 0.0043  | Compound 10 |
| 10 | train | 6.4100 | 7.0384  | 0.6284  | Compound 13 |
| 11 | test  | 4.1900 | 5.0712  | 0.8812  | Compound 14 |
| 12 | train | 6.1200 | 5.9780  | -0.1420 | Compound 15 |
| 13 | test  | 7.8500 | 7.5791  | -0.2709 | Compound 16 |
| 14 | train | 7.8500 | 7.6571  | -0.1929 | Compound 16 |
| 15 | test  | 4.7300 | 5.1130  | 0.3830  | Compound 17 |
| 16 | train | 4.4600 | 4.6881  | 0.2281  | Compound 19 |
| 17 | train | 5.2900 | 5.2925  | 0.0025  | Compound 20 |
| 18 | test  | 6.2700 | 6.0297  | -0.2403 | Compound 21 |
| 19 | train | 6.8100 | 6.7701  | -0.0399 | Compound 24 |
| 20 | test  | 6.7200 | 5.9345  | -0.7855 | Compound 25 |
| 21 | train | 6.1500 | 6.2667  | 0.1167  | Compound 26 |
| 22 | train | 5.4200 | 4.8148  | -0.6052 | Compound 27 |
| 23 | train | 8.0300 | 8.4734  | 0.4434  | Compound 32 |
| 24 | train | 9.6000 | 9.5475  | -0.0525 | Compound 36 |
| 25 | train | 6.7000 | 6.4662  | -0.2338 | Compound 41 |
| 26 | train | 5.4700 | 5.2669  | -0.2031 | Compound 39 |
| 27 | train | 4.4000 | 4.0505  | -0.3495 | Compound 42 |
| 28 | train | 4.3000 | 4.3258  | 0.0258  | Compound 43 |
| 29 | train | 6.5500 | 7.3868  | 0.8368  | Compound 44 |
| 30 | train | 5.2800 | 4.5731  | -0.7069 | Compound 45 |
| 31 | train | 6.9200 | 6.5827  | -0.3373 | Compound 46 |
| 32 | test  | 6.4900 | 5.7909  | -0.6991 | Compound 47 |
| 33 | test  | 4.6700 | 5.6772  | 1.0072  | Compound 48 |
| 34 | test  | 5.4800 | 5.6995  | 0.2195  | Compound 49 |
| 35 | train | 7.7700 | 7.2043  | -0.5657 | Compound 50 |
| 36 | train | 6.5700 | 6.5637  | -0.0063 | Compound 52 |
| 37 | train | 6.5700 | 6.5637  | -0.0063 | Compound 52 |
| 38 | train | 7.4400 | 7.7771  | 0.3371  | Compound 53 |
| 39 | test  | 8.0500 | 7.6511  | -0.3989 | Compound 54 |
| 40 | train | 4.4700 | 4.4779  | 0.0079  | Compound 55 |
| 41 | train | 5.9600 | 6.9058  | 0.9458  | Compound 56 |
| 42 | test  | 5.9600 | 7.0083  | 1.0483  | Compound 56 |
| 43 | train | 7.8900 | 7.3378  | -0.5522 | Compound 57 |
| 44 | train | 5.5900 | 5.6069  | 0.0169  | Compound 58 |
| 45 | train | 6.1000 | 5.8328  | -0.2672 | Compound 59 |
| 46 | train | 6.1000 | 5.8038  | -0.2962 | Compound 59 |
| 47 | test  | 5.6000 | 5.9705  | 0.3705  | Compound 60 |
| 48 | train | 5.6000 | 5.9677  | 0.3677  | Compound 60 |
| 49 | train | 7.0300 | 6.9782  | -0.0518 | Compound 64 |
| 50 | train | 7.0300 | 6.9782  | -0.0518 | Compound 64 |

|    |       |        |        |         |             |
|----|-------|--------|--------|---------|-------------|
| 51 | train | 4.9300 | 6.0672 | 1.1372  | Compound 65 |
| 52 | train | 5.5000 | 6.3753 | 0.8753  | Compound 68 |
| 53 | train | 6.0500 | 6.1567 | 0.1067  | Compound 70 |
| 54 | train | 6.6800 | 5.6077 | -1.0723 | Compound 71 |
| 55 | train | 5.3600 | 5.5218 | 0.1618  | Compound 73 |
| 56 | train | 6.0500 | 5.9258 | -0.1242 | Compound 74 |
| 57 | train | 5.3600 | 5.1600 | -0.2000 | Compound 76 |
| 58 | train | 7.5100 | 7.3636 | -0.1464 | Compound 78 |
| 59 | train | 7.4100 | 7.0051 | -0.4049 | Compound 79 |
| 60 | train | 7.4100 | 7.0051 | -0.4049 | Compound 79 |
| 61 | train | 7.8000 | 7.0067 | -0.7933 | Compound 80 |
| 62 | train | 5.7300 | 5.8822 | 0.1521  | Compound 82 |
| 63 | test  | 5.7300 | 6.0230 | 0.2930  | Compound 82 |
| 64 | train | 4.3600 | 5.3872 | 1.0272  | Compound 83 |
| 65 | test  | 6.9200 | 6.2054 | -0.7146 | Compound 84 |
| 66 | test  | 7.1000 | 6.2631 | -0.8369 | Compound 85 |
| 67 | train | 6.0500 | 5.9840 | -0.0660 | Compound 86 |
| 68 | train | 4.5200 | 5.4614 | 0.9414  | Compound 87 |
| 69 | test  | 6.6200 | 6.4352 | -0.1848 | Compound 89 |
| 70 | train | 6.1000 | 6.3364 | 0.2364  | Compound 90 |
| 71 | train | 6.0900 | 6.1060 | 0.0160  | Compound 93 |
| 72 | train | 9.4800 | 8.8566 | -0.6234 | Compound 94 |
| 73 | train | 5.9200 | 5.4795 | -0.4405 | Compound 97 |
| 74 | train | 6.5200 | 6.5767 | 0.0567  | Compound 99 |

Ranking score = 0.693689

| Training Set |                | Test Set |                |
|--------------|----------------|----------|----------------|
| S.D.         | R <sup>2</sup> | RMSE     | Q <sup>2</sup> |
| 0.4677       | 0.8602         | 0.5788   | 0.7307         |

Optimum number of factors = 2

**Table S2.** Report for Numeric Model pls\_38 (BChE)

| <b>ID</b> | <b>Set</b> | <b>Y(Obs)</b> | <b>Y(Pred)</b> | <b>Error</b> | <b>Name</b>  |
|-----------|------------|---------------|----------------|--------------|--------------|
| 1         | train      | 5.0700        | 5.2737         | 0.2037       | Compound 2   |
| 2         | train      | 7.3200        | 7.4471         | 0.1271       | Compound 7   |
| 3         | test       | 5.3500        | 5.9805         | 0.6305       | Compound 9   |
| 4         | test       | 7.5800        | 6.5828         | -0.9972      | Compound 11  |
| 5         | train      | 7.5800        | 7.0026         | -0.5774      | Compound 11  |
| 6         | train      | 6.4600        | 5.7392         | -0.7208      | Compound 12  |
| 7         | train      | 5.3000        | 5.5860         | 0.2860       | Compound 14  |
| 8         | train      | 5.3000        | 6.0079         | 0.7079       | Compound 14  |
| 9         | test       | 5.1000        | 4.9656         | -0.1344      | Compound 17  |
| 10        | train      | 5.1000        | 5.3410         | 0.2410       | Compound 17  |
| 11        | train      | 5.3300        | 5.5803         | 0.2503       | Compound 22  |
| 12        | test       | 6.7100        | 6.9142         | 0.2042       | Compound 23  |
| 13        | train      | 6.1000        | 6.4463         | 0.3463       | Compound 24  |
| 14        | train      | 6.2900        | 6.3338         | 0.0438       | Compound 27  |
| 15        | train      | 5.5100        | 5.9518         | 0.4418       | Compound 30  |
| 16        | test       | 5.5100        | 5.8733         | 0.3633       | Compound 30  |
| 17        | train      | 7.8200        | 7.2488         | -0.5712      | Compound 31  |
| 18        | train      | 7.4000        | 7.4993         | 0.0993       | Compound 32  |
| 19        | train      | 5.8400        | 5.6192         | -0.2208      | Compound 33  |
| 20        | test       | 8.0200        | 7.1981         | -0.8219      | Compound 35  |
| 21        | train      | 7.9200        | 7.0999         | -0.8201      | Compound 37  |
| 22        | train      | 5.7200        | 4.6638         | -1.0562      | Compound 49  |
| 23        | test       | 5.5700        | 4.9310         | -0.6390      | Compound 54  |
| 24        | train      | 4.6400        | 4.2273         | -0.4127      | Compound 55  |
| 25        | test       | 5.0400        | 5.1152         | 0.0752       | Compound 57  |
| 26        | train      | 5.0400        | 4.8504         | -0.1896      | Compound 57  |
| 27        | train      | 5.9500        | 6.9274         | 0.9774       | Compound 59  |
| 28        | train      | 5.5100        | 5.4517         | -0.0583      | Compound 61  |
| 29        | train      | 4.7600        | 5.2424         | 0.4824       | Compound 63  |
| 30        | test       | 6.2900        | 5.8604         | -0.4296      | Compound 64  |
| 31        | train      | 6.2900        | 6.3798         | 0.0898       | Compound 64  |
| 32        | train      | 6.0700        | 5.8583         | -0.2117      | Compound 72  |
| 33        | train      | 5.7000        | 6.1409         | 0.4409       | Compound 73  |
| 34        | train      | 5.7500        | 5.5528         | -0.1972      | Compound 75  |
| 35        | train      | 7.0300        | 6.9396         | -0.0904      | Compound 82  |
| 36        | test       | 7.5200        | 6.9265         | -0.5935      | Compound 83  |
| 37        | train      | 7.5200        | 6.7775         | -0.7425      | Compound 83  |
| 38        | train      | 5.4100        | 5.5335         | 0.1235       | Compound 84  |
| 39        | train      | 4.4600        | 4.8961         | 0.4361       | Compound 90  |
| 40        | train      | 6.8300        | 6.7584         | -0.0716      | Compound 91  |
| 41        | test       | 6.0400        | 5.9689         | -0.0711      | Compound 93  |
| 42        | train      | 6.0400        | 5.8844         | -0.1556      | Compound 93  |
| 43        | train      | 6.6000        | 6.6204         | 0.0204       | Compound 96  |
| 44        | train      | 4.4400        | 5.0855         | 0.6455       | Compound 103 |
| 45        | train      | 4.8800        | 4.0263         | -0.8537      | Compound 107 |
| 46        | train      | 5.0900        | 5.3864         | 0.2964       | Compound 113 |
| 47        | train      | 4.0500        | 4.7404         | 0.6904       | Compound 114 |

Ranking score = 0.682337

| Training Set |                | Test Set |                |
|--------------|----------------|----------|----------------|
| S.D.         | R <sup>2</sup> | RMSE     | Q <sup>2</sup> |
| 0.5091       | 0.7746         | 0.5406   | 0.7174         |

Optimum number of factors = 3

**Table S3.** Report for Numeric Model kpls\_desc\_44 (MAO)

| <b>ID</b> | <b>Set</b> | <b>Y(Obs)</b> | <b>Y(Pred)</b> | <b>Error</b> | <b>Name</b> |
|-----------|------------|---------------|----------------|--------------|-------------|
| 1         | test       | 8.0500        | 8.4662         | 0.4162       | Compound 1  |
| 2         | test       | 7.8500        | 6.9668         | -0.8832      | Compound 2  |
| 3         | train      | 7.8500        | 8.0120         | 0.1620       | Compound 2  |
| 4         | train      | 4.5200        | 4.2258         | -0.2942      | Compound 3  |
| 5         | train      | 4.6200        | 4.4534         | -0.1666      | Compound 5  |
| 6         | train      | 5.8200        | 5.9741         | 0.1541       | Compound 6  |
| 7         | train      | 5.9700        | 5.9611         | -0.0089      | Compound 8  |
| 8         | test       | 4.3000        | 4.4859         | 0.1859       | Compound 9  |
| 9         | train      | 6.2800        | 6.3942         | 0.1142       | Compound 10 |
| 10        | train      | 8.2000        | 7.8075         | -0.3925      | Compound 11 |
| 11        | train      | 8.8300        | 8.6207         | -0.2093      | Compound 12 |
| 12        | test       | 8.4100        | 8.0927         | -0.3173      | Compound 13 |
| 13        | train      | 5.3200        | 6.0600         | 0.7400       | Compound 15 |
| 14        | test       | 7.2500        | 7.1778         | -0.0722      | Compound 16 |
| 15        | train      | 8.0800        | 7.4883         | -0.5917      | Compound 17 |
| 16        | test       | 4.1300        | 5.1916         | 1.0616       | Compound 18 |
| 17        | train      | 5.1200        | 4.3418         | -0.7782      | Compound 21 |
| 18        | train      | 6.1900        | 5.7054         | -0.4846      | Compound 20 |
| 19        | train      | 5.4400        | 5.8513         | 0.4113       | Compound 25 |
| 20        | train      | 5.6500        | 5.3474         | -0.3026      | Compound 27 |
| 21        | train      | 7.1900        | 7.4145         | 0.2245       | Compound 30 |
| 22        | train      | 7.7000        | 7.3590         | -0.3410      | Compound 31 |
| 23        | test       | 5.9200        | 5.8089         | -0.1111      | Compound 33 |
| 24        | train      | 6.3100        | 7.2794         | 0.9694       | Compound 34 |
| 25        | train      | 8.1000        | 8.1536         | 0.0536       | Compound 35 |
| 26        | test       | 8.8300        | 8.5633         | -0.2667      | Compound 36 |
| 27        | test       | 5.0500        | 6.0140         | 0.9640       | Compound 37 |
| 28        | train      | 7.3500        | 7.4074         | 0.0574       | Compound 38 |
| 29        | train      | 6.0300        | 6.7697         | 0.7397       | Compound 39 |
| 30        | train      | 4.1900        | 4.6223         | 0.4322       | Compound 41 |
| 31        | train      | 4.1900        | 4.3326         | 0.1426       | Compound 41 |
| 32        | train      | 5.5600        | 5.4238         | -0.1362      | Compound 43 |
| 33        | train      | 6.7000        | 6.0072         | -0.6928      | Compound 48 |
| 34        | train      | 8.7500        | 8.3541         | -0.3959      | Compound 49 |
| 35        | train      | 7.0100        | 6.8285         | -0.1815      | Compound 50 |
| 36        | test       | 7.7200        | 7.3274         | -0.3926      | Compound 53 |
| 37        | test       | 6.6000        | 6.3355         | -0.2645      | Compound 57 |
| 38        | train      | 4.5200        | 5.1886         | 0.6686       | Compound 56 |
| 39        | train      | 8.0600        | 8.1439         | 0.0839       | Compound 58 |
| 40        | test       | 5.4800        | 5.7527         | 0.2727       | Compound 60 |
| 41        | train      | 4.0400        | 3.6727         | -0.3673      | Compound 63 |
| 42        | train      | 5.0600        | 5.5119         | 0.4519       | Compound 64 |
| 43        | train      | 6.0900        | 6.8697         | 0.7797       | Compound 66 |
| 44        | train      | 6.0900        | 6.3778         | 0.2878       | Compound 66 |
| 45        | train      | 7.7000        | 6.9517         | -0.7483      | Compound 67 |
| 46        | train      | 7.7000        | 7.3785         | -0.3215      | Compound 67 |
| 47        | train      | 7.8500        | 7.5407         | -0.3093      | Compound 68 |
| 48        | train      | 7.8500        | 7.0781         | -0.7719      | Compound 68 |
| 49        | train      | 5.1700        | 4.8958         | -0.2742      | Compound 69 |

|    |       |        |        |         |              |
|----|-------|--------|--------|---------|--------------|
| 50 | test  | 5.1700 | 5.0669 | -0.1031 | Compound 69  |
| 51 | train | 6.3500 | 6.2436 | -0.1064 | Compound 70  |
| 52 | train | 4.7300 | 5.7490 | 1.0190  | Compound 71  |
| 53 | train | 5.5300 | 6.1923 | 0.6623  | Compound 74  |
| 54 | train | 4.5500 | 6.1653 | 1.6153  | Compound 77  |
| 55 | test  | 6.2300 | 6.0161 | -0.2139 | Compound 81  |
| 56 | test  | 4.7000 | 5.9562 | 1.2562  | Compound 82  |
| 57 | train | 8.8000 | 7.6816 | -1.1184 | Compound 88  |
| 58 | train | 7.7600 | 8.0244 | 0.2644  | Compound 89  |
| 59 | test  | 6.8400 | 5.9818 | -0.8582 | Compound 91  |
| 60 | train | 7.4500 | 7.2265 | -0.2235 | Compound 96  |
| 61 | train | 7.4500 | 6.7487 | -0.7013 | Compound 96  |
| 62 | train | 8.4200 | 8.4886 | 0.0686  | Compound 97  |
| 63 | train | 8.2900 | 7.3503 | -0.9397 | Compound 99  |
| 64 | train | 5.8500 | 5.3310 | -0.5190 | Compound 100 |
| 65 | train | 4.2100 | 5.7577 | 1.5477  | Compound 101 |
| 66 | train | 4.8100 | 4.4444 | -0.3656 | Compound 105 |
| 67 | train | 4.5000 | 3.5595 | -0.9405 | Compound 110 |
| 68 | train | 4.9800 | 6.0754 | 1.0954  | Compound 111 |
| 69 | train | 6.0700 | 6.6665 | 0.5965  | Compound 113 |
| 70 | train | 6.2400 | 5.5807 | -0.6593 | Compound 116 |
| 71 | test  | 5.6200 | 6.4146 | 0.7946  | Compound 118 |

Ranking score = 0.808180

| Training Set |                | Test Set |                |
|--------------|----------------|----------|----------------|
| S.D.         | R <sup>2</sup> | RMSE     | Q <sup>2</sup> |
| 0.6447       | 0.8132         | 0.6200   | 0.8130         |

Optimum number of factors = 4

**Table S4.** List of the different types of bonds with their respective interacting amino acids, that took part in the interaction between the three best ligands as well as controls and the target receptor, AChE.

| Name of Ligand   | Interacting amino acids                                                                                                                                                                         | H-bond                                                               | C-H bond     | Pi-pi stacking                                            | $\pi$ -alkyl                  |
|------------------|-------------------------------------------------------------------------------------------------------------------------------------------------------------------------------------------------|----------------------------------------------------------------------|--------------|-----------------------------------------------------------|-------------------------------|
| <b>Donepezil</b> | GLU A:202, GLY A:448, GLY A:121,<br>HIS A:447, PHE A:338, PHE A:297,<br>PHE A:295, VAL A:294, ARG A:296,<br>SER A:293, LEU A:289, TYR A:341,<br>TRP A:286, TRP A:86, TYR A:337 and<br>TYR A:124 | PHE A:295,<br>ARG A:296                                              | TYR<br>A:341 | TRP A:86,<br>TRP A:286<br>and TYR<br>A:337                | TYR<br>A:124                  |
|                  | GLY A:342, GLU A:292, TYR A:72,<br>LEU A:76, PHE A:295, VAL A:294,<br>ARG A:296, LEU A:289, SER A:293,<br>PHE A:338, PHE A:297, and TRP<br>A:286                                                | -                                                                    | SER<br>A:293 | TRP A:286                                                 | PHE<br>A:338,<br>PHE<br>A:297 |
| <b>Apigenin</b>  | VAL A:294, PHE A:295, ASP A:74,<br>TRP A:86, PHE A:338, PHE A:297,<br>HIS A:447, SER A:203, GLY A:121,<br>GLY A:122, GLY A:120 and ALA<br>A:204                                                 | SER A:293, TYR<br>A:337                                              | -            | TRP A:286,<br>TYR A:341<br>and TYR<br>A:124               | -                             |
|                  | HIS A:447, SER A:203, GLY A:122,<br>PHE A:297, VAL A:294, LEU A:289,<br>ASP A:74 and TRP A:86                                                                                                   | GLY A:121,<br>ARG A:296,<br>PHE A:295, SER<br>A:293 and TYR<br>A:337 | -            | TYR A:124,<br>PHE A:338,<br>TYR A:341<br>and TRP<br>A:286 | -                             |
| <b>Luteolin</b>  | TYR A:72, LEU A:76, ASP A:74, TYR<br>A:124, TYR A:337, PHE A:297, PHE<br>A:338, ARG A:296, VAL A:294, LEU<br>A:289, SER A:293 and GLU A:292                                                     | PHE A:295                                                            | -            | TRP A:286<br>and TYR<br>A:341                             | -                             |



**Table S5.** List of the different types of bonds with their respective interacting amino acids, that took part in the interaction between the three best ligands as well as controls and the target receptor, BuChE.

| Name of Ligand      | Interacting amino acids                                                                                                                                  | H-bond                                                         | C-H bond  | Pi-pi stacking                | $\pi$ -alkyl                                                                          | $\pi$ -sigma |
|---------------------|----------------------------------------------------------------------------------------------------------------------------------------------------------|----------------------------------------------------------------|-----------|-------------------------------|---------------------------------------------------------------------------------------|--------------|
| <b>Donepezil</b>    | GLY A:439, ILE A:442, GLY A:116,<br>GLY A:117, SER A:198, PHE A:398,<br>VAL A:288, THR A:120, TYR A:332<br>and ASP A:70                                  | PHE A:295, ARG<br>A:296                                        | -         | PHE A:329<br>and TRP<br>A:231 | ALA A:328,<br>TRP A:430,<br>TYR A:440,<br>MET A:437,<br>HIS A:438<br>and LEU<br>A:286 | TRP<br>A:82  |
|                     | THR A:120, GLY A:117, LEU A:286,<br>GLY A:116, GLY A:439, GLU A:197,<br>GLY A:115 and TYR A:128                                                          | SER A:198                                                      | -         | PHE A:329                     | HIS A:438,<br>PHE A:398                                                               | TRP<br>A:82  |
| <b>Quercetin</b>    | TYR A:440, GLY A:439, SER A:198,<br>ILE A:442, GLY A:115, TYR A:128,<br>GLY A:116, ILE A:69, PRO A:84 and<br>TYR A:332                                   | ASP A:70, ASN<br>A:68, ASN A:83,<br>HIS A:438 and<br>GLU A:197 | -         | TRP A:82                      | -                                                                                     | THR<br>A:120 |
|                     | PRO A:84, GLN A:67, ILE A:69, ASP<br>A:70, GLY A:116, TYR A:114, TYR<br>A:128, SER A:198, GLY A:115, GLU<br>A:197, GLY A:439, ILE A:442 and<br>TYR A:440 | ASN A:68 and<br>HIS A:438                                      | ASN A:83  | TRP A:82                      | -                                                                                     | THR<br>A:120 |
| <b>Ellagic acid</b> | ASP A:70, TYR A:332, TRP A:430,<br>ALA A:328, GLY A:439, SER A:198,<br>ILE A:442, GLY A:115, TYR A:128,<br>TYR A:114, GLY A:116 and GLY<br>A:121         | GLU A:197                                                      | HIS A:438 | TRP A:82                      | -                                                                                     | -            |

**Table S6.** List of the different types of bonds with their respective interacting amino acids, that took part in the interaction between the three best ligands as well as controls and the target receptor, MAO.

| Name of Ligand      | Interacting amino acids                                                                                                                                                                   | H-bond                                  | C-H bond                                                             | Pi-pi stacking                             | $\pi$ -alkyl                                      | $\pi$ -sulfur |
|---------------------|-------------------------------------------------------------------------------------------------------------------------------------------------------------------------------------------|-----------------------------------------|----------------------------------------------------------------------|--------------------------------------------|---------------------------------------------------|---------------|
| <b>Donepezil</b>    | THR A:426, GLY A:58, SER A:59,<br>LYS A:296, TYR A:60, TYR A:435,<br>MET A:436, THR A:43, GLY A:40,<br>GLY A:13 and SER A:15                                                              | -                                       | TYR A:398,<br>GLY A:434,<br>CYS A:172,<br>GLN A:206<br>and ILE A:198 | ARG A:42,<br>TYR A:326<br>and LEU<br>A:171 | ALA A:439,<br>ILE A:14<br>and PHE<br>A:343        | -             |
| <b>Galanthamine</b> | PRO A:102, PHE A:103, THR<br>A:196, THR A:478, THR A:195,<br>ARG A:120, TRP A:119, THR<br>A:479 and HIS A:115                                                                             | ASN A:116                               | GLU A:483                                                            | -                                          | TYR A:122                                         | -             |
| <b>Chlorogenic</b>  | ILE A:14, THR A:43, MET A:436,<br>GLY A:58, TYR A:435, GLY A:205,<br>TYR A:60, SER A:59, GLY A:434,<br>ALA A:439, GLY A:425, ALA<br>A:263, ILE A:264, PRO A:265, GLY<br>A:13 and GLY A:41 | GLN A:206, THR<br>A:426 and GLY<br>A:40 | SER A:15 and<br>ARG A:42                                             | TYR A:398                                  | -                                                 | -             |
| <b>Apigenin</b>     | GLY A:13, THR A:43, GLY A:434,<br>VAL A:61, GLN A:65, TYR A:60,<br>SER A:59, PHE A:343, TYR A:398,<br>GLY A:58 and THR A:426                                                              | ASN A:68 and<br>HIS A:438               | -                                                                    | -                                          | ALA A:439,<br>ILE A:14,<br>ARG A:42,<br>MET A:436 | CYS<br>A:397  |
| <b>Luteolin</b>     | THR A:43, GLY A:58, SER A:59,<br>TYR A:60, GLY A:434, THR A:426,<br>GLY A:425 and GLY A:13                                                                                                | GLU A:197                               | -                                                                    | -                                          | ILE A:14,<br>ALA A:439<br>and MET<br>A:436        | CYS<br>A:397  |

Table S7. admeSAR prediction test compounds.

|                                | Apigenin | Caffeic Acid | Chlorogenic acid | (R)-Donepezil | Ellagic acid | Galanthamine | Gallic acid | Kaempferol | Luteolin | P-coumaric | Quercetin |
|--------------------------------|----------|--------------|------------------|---------------|--------------|--------------|-------------|------------|----------|------------|-----------|
| Blood Brain Barrier            | -        | -            | -                | +             | -            | +            | -           | -          | -        | -          | -         |
| BRCP inhibitor                 | +        | -            | -                | -             | -            | -            | -           | +          | +        | -          | +         |
| Biodegradation                 | -        | -            | -                | -             | -            | -            | +           | -          | -        | +          | -         |
| BSEP inhibitor                 | -        | -            | -                | +             | -            | -            | -           | -          | -        | -          | -         |
| Caco-2                         | +        | +            | -                | +             | -            | +            | -           | -          | +        | +          | -         |
| CYP1A2 inhibition              | +        | -            | -                | +             | -            | -            | -           | +          | +        | -          | +         |
| CYP2C19 inhibition             | +        | -            | -                | -             | -            | -            | -           | +          | -        | -          | -         |
| CYP2C9 inhibition              | +        | -            | -                | -             | -            | -            | -           | +          | -        | -          | -         |
| CYP2C9 substrate               | -        | -            | +                | -             | -            | -            | -           | -          | -        | -          | -         |
| CYP2D6 inhibition              | -        | -            | -                | +             | -            | -            | -           | -          | -        | -          | -         |
| CYP2D6 substrate               | -        | -            | -                | +             | -            | +            | -           | -          | -        | -          | -         |
| CYP3A4 inhibition              | +        | -            | -                | -             | -            | -            | -           | +          | +        | -          | +         |
| CYP3A4 substrate               | -        | -            | +                | +             | -            | +            | -           | +          | -        | -          | +         |
| CYP inhibitory promiscuity     | +        | -            | -                | +             | -            | -            | -           | +          | +        | -          | +         |
| Human Intestinal Absorption    | +        | +            | +                | +             | +            | +            | +           | +          | +        | +          | +         |
| Human oral bioavailability     | -        | +            | -                | +             | +            | +            | +           | -          | -        | -          | -         |
| MATE1 inhibitor                | +        | -            | -                | -             | -            | -            | -           | +          | +        | -          | +         |
| Micronuclear OATP1B1 inhibitor | +        | +            | +                | -             | +            | -            | +           | +          | +        | +          | +         |
| OATP1B3 inhibitor              | +        | +            | +                | +             | +            | +            | +           | -          | +        | +          | +         |
| OATP2B1 inhibitor              | -        | -            | -                | -             | -            | -            | -           | +          | +        | -          | +         |
| OCT1 inhibitor                 | -        | -            | -                | +             | -            | -            | -           | -          | -        | -          | -         |
| OCT2 inhibitor                 | -        | -            | -                | +             | -            | -            | -           | -          | -        | -          | -         |

|                          |      |      |      |      |      |      |      |      |      |      |      |
|--------------------------|------|------|------|------|------|------|------|------|------|------|------|
| P-glycoprotein inhibitor | -    | -    | -    | +    | -    | -    | -    | -    | -    | -    | -    |
| P-glycoprotein substrate | -    | -    | -    | +    | -    | +    | -    | -    | -    | -    | -    |
| Plasma protein binding   | 0.95 | 0.78 | 0.75 | 0.97 | 0.99 | 0.50 | 0.67 | 1.06 | 1.04 | 0.72 | 1.17 |
| UGT catalyzed            | +    | +    | -    | -    | +    | +    | +    | -    | +    | +    | +    |

Table S8. Toxicity Prediction test compounds.

|                                 | Apigenin     | Caffeic Acid | Chlorogenic acid | (R)-Donepezil | Ellagic acid | Galanthamine | Gallic acid  | Kaempferol   | Luteolin     | P-coumaric   | Quercetin    |
|---------------------------------|--------------|--------------|------------------|---------------|--------------|--------------|--------------|--------------|--------------|--------------|--------------|
| Ames mutagenesis                | -            | -            | -                | -             | -            | -            | -            | +            | -            | -            | +            |
| Acute Oral Toxicity (c)         | III          | IV           | III              | III           | II           | III          | III          | II           | II           | III          | II           |
| Androgen receptor binding       | +            | +            | +                | +             | +            | -            | +            | +            | +            | +            | +            |
| Aromatase binding               | +            | -            | +                | +             | +            | -            | -            | +            | +            | -            | +            |
| Avian toxicity                  | -            | -            | -                | -             | -            | -            | -            | -            | -            | -            | -            |
| Carcinogenicity (binary)        | -            | -            | -                | -             | -            | -            | -            | -            | -            | -            | -            |
| Carcinogenicity (ternary)       | Non-required | Non-required | Non-required     | Non-required  | Non-required | Non-required | Non-required | Non-required | Non-required | Non-required | Non-required |
| Crustacea aquatic toxicity      | -            | -            | -                | +             | -            | +            | -            | -            | -            | -            | -            |
| Eye corrosion                   | -            | -            | -                | -             | -            | -            | -            | -            | -            | +            | -            |
| Eye irritation                  | +            | +            | -                | -             | +            | -            | +            | +            | +            | +            | +            |
| Estrogen receptor binding       | +            | -            | +                | +             | -            | -            | -            | +            | +            | -            | +            |
| Fish aquatic toxicity           | +            | +            | +                | +             | +            | +            | +            | +            | +            | +            | +            |
| Glucocorticoid receptor binding | +            | -            | +                | +             | +            | -            | -            | +            | +            | -            | +            |
| Honey bee toxicity              | +            | +            | +                | -             | -            | +            | +            | +            | +            | +            | +            |
| Hepatotoxicity                  | +            | -            | -                | -             | +            | -            | -            | +            | +            | -            | +            |

|                                                     |      |      |      |      |      |      |      |      |      |       |      |
|-----------------------------------------------------|------|------|------|------|------|------|------|------|------|-------|------|
| <b>Human<br/>either-a-go-<br/>go<br/>inhibition</b> | -    | -    | -    | +    | -    | -    | -    | -    | -    | -     | -    |
| <b>Acute Oral<br/>Toxicity</b>                      | 1.15 | 1.57 | 1.76 | 2.38 | 1.04 | 2.80 | 1.55 | 1.74 | 2.52 | 1.99  | 2.56 |
| <b>Tetrahymen<br/>a pyriformis</b>                  | 1.23 | 0.10 | 0.68 | 1.66 | 1.66 | 0.94 | 0.69 | 0.82 | 1.14 | -0.35 | 0.89 |
| <b>Thyroid<br/>receptor<br/>binding</b>             | +    | -    | -    | +    | -    | +    | -    | +    | +    | -     | +    |
| <b>PPAR<br/>gamma</b>                               | +    | +    | +    | -    | +    | -    | -    | +    | +    | -     | +    |

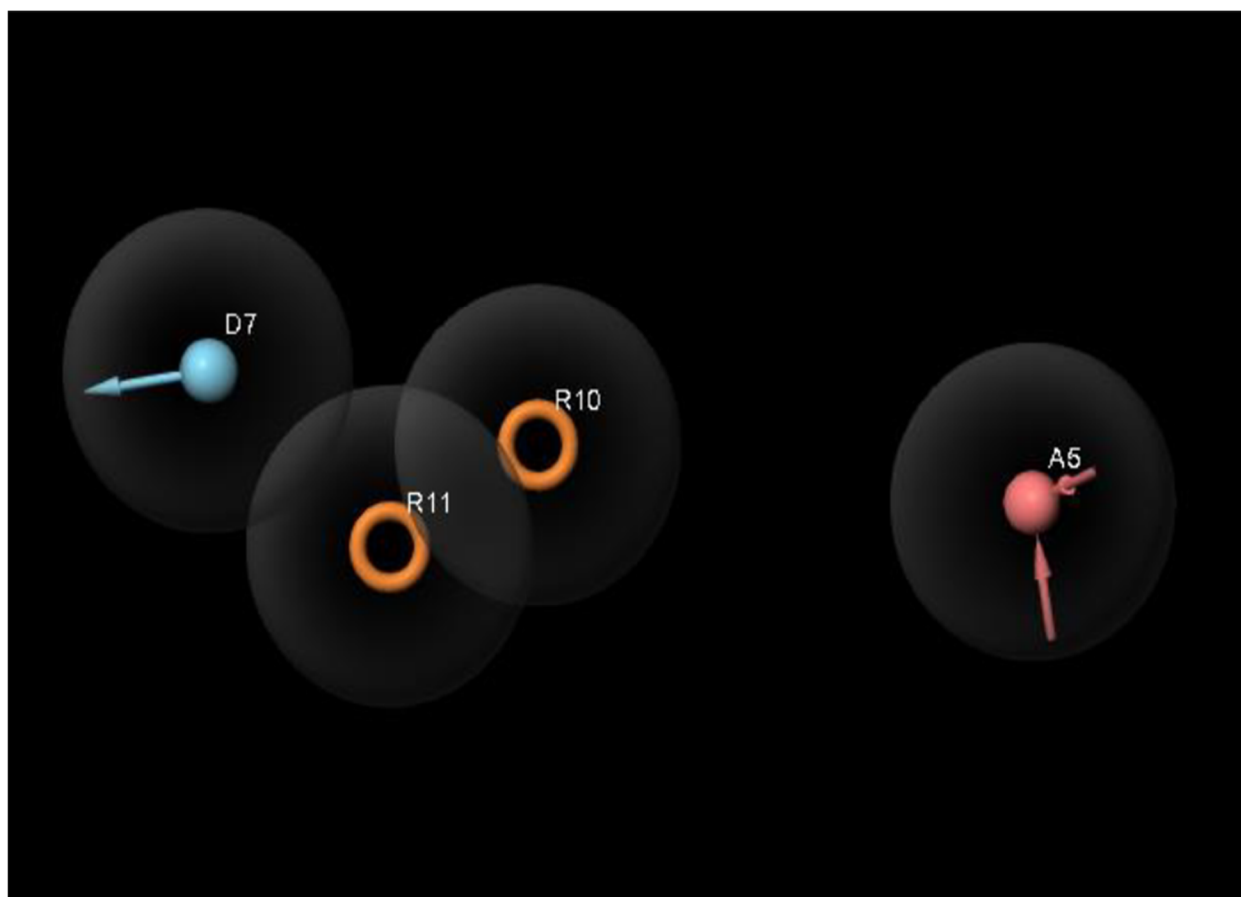

**Figure S1.** Screening hypothesis is generated by a structure-based e-pharmacophore model consisting of one hydrogen bond acceptor (A), one hydrogen bond donor (D) and two aromatic rings (R).

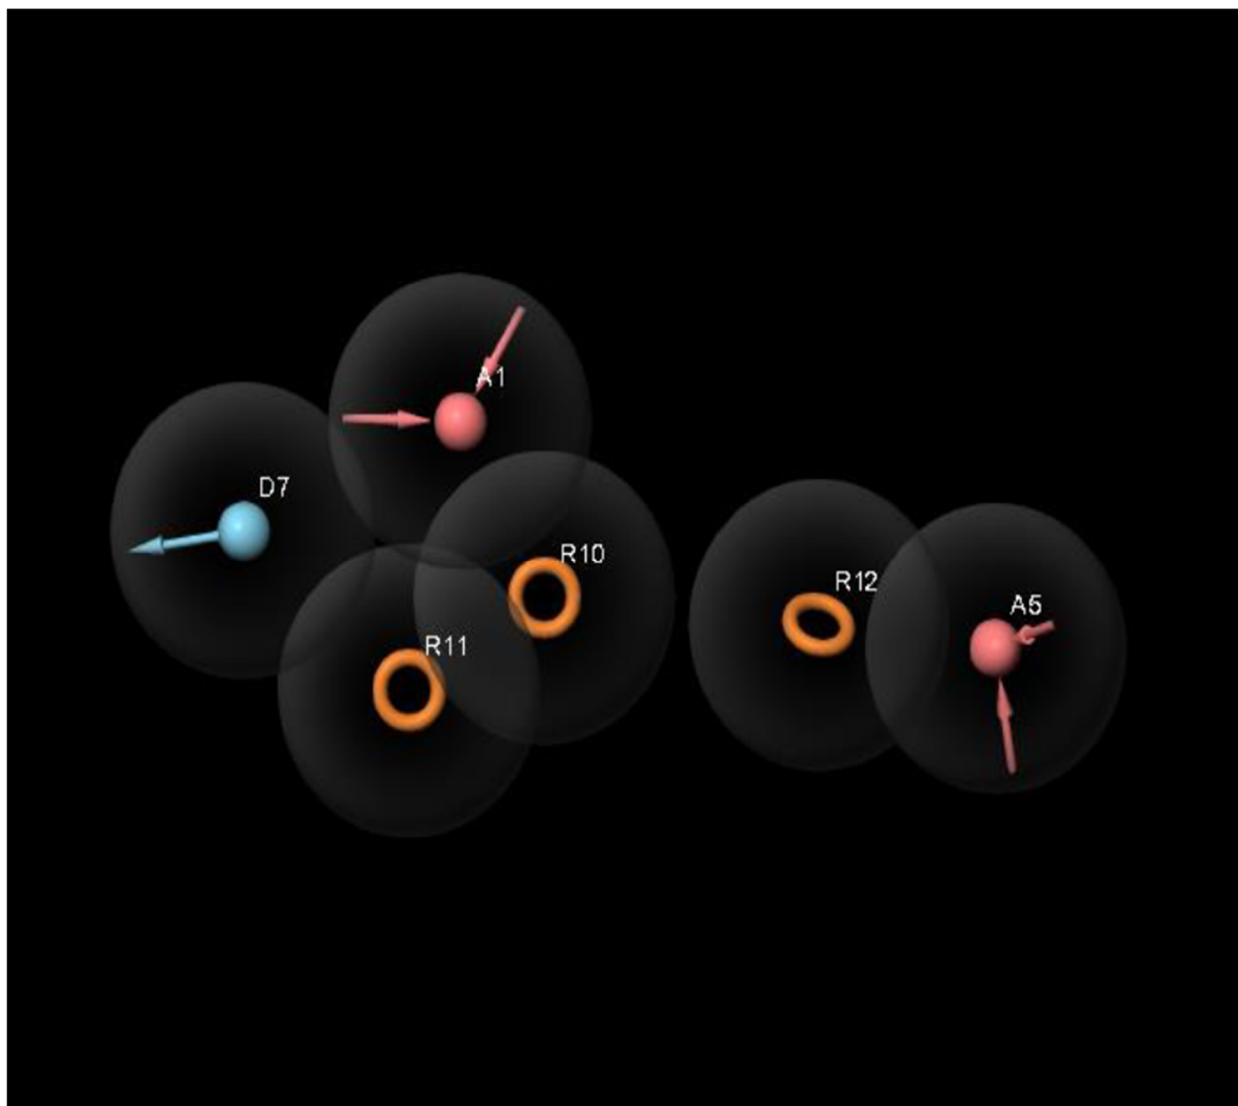

**Figure S2.** Screening hypothesis is generated by a structure-based e-pharmacophore model consisting of two hydrogen bond acceptor (A), one hydrogen bond donor (D) and three aromatic rings (R).

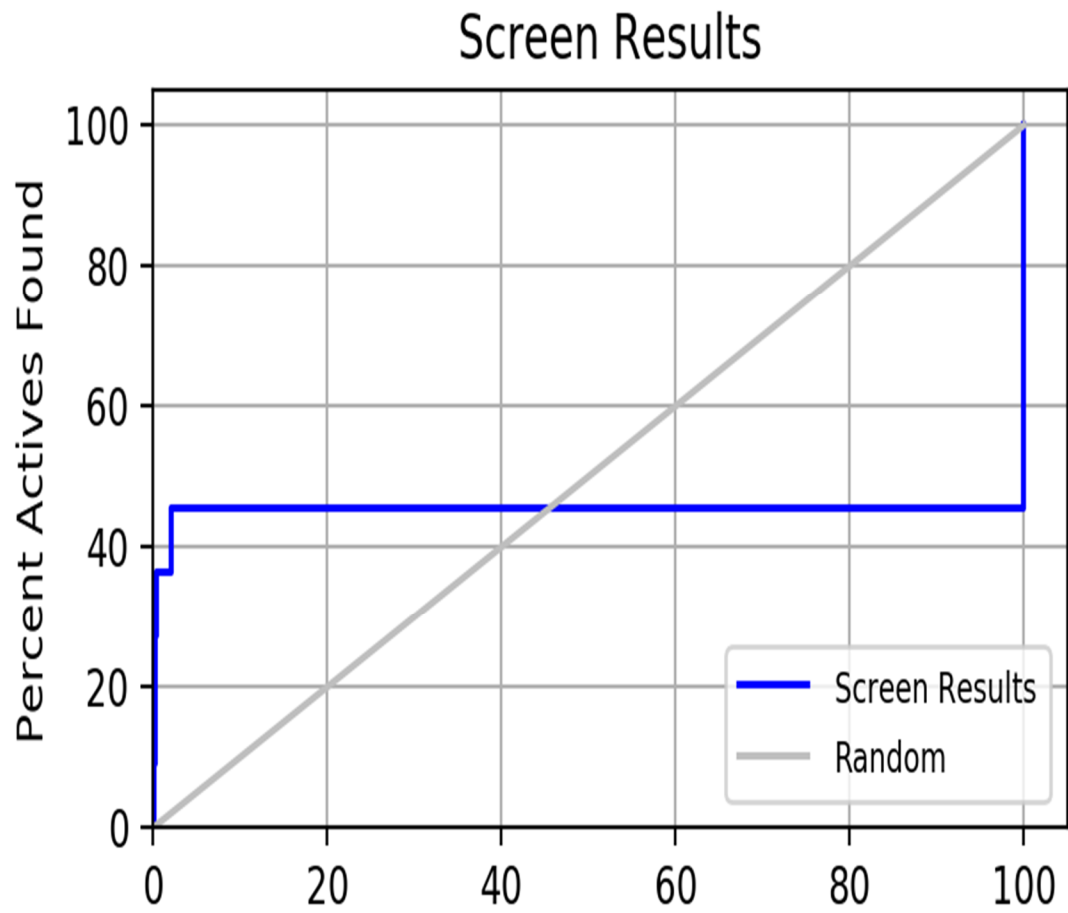

Figure S3: ROC Plot between percent screen and percent actives found



## Receiver Operating Characteristic (ROC)

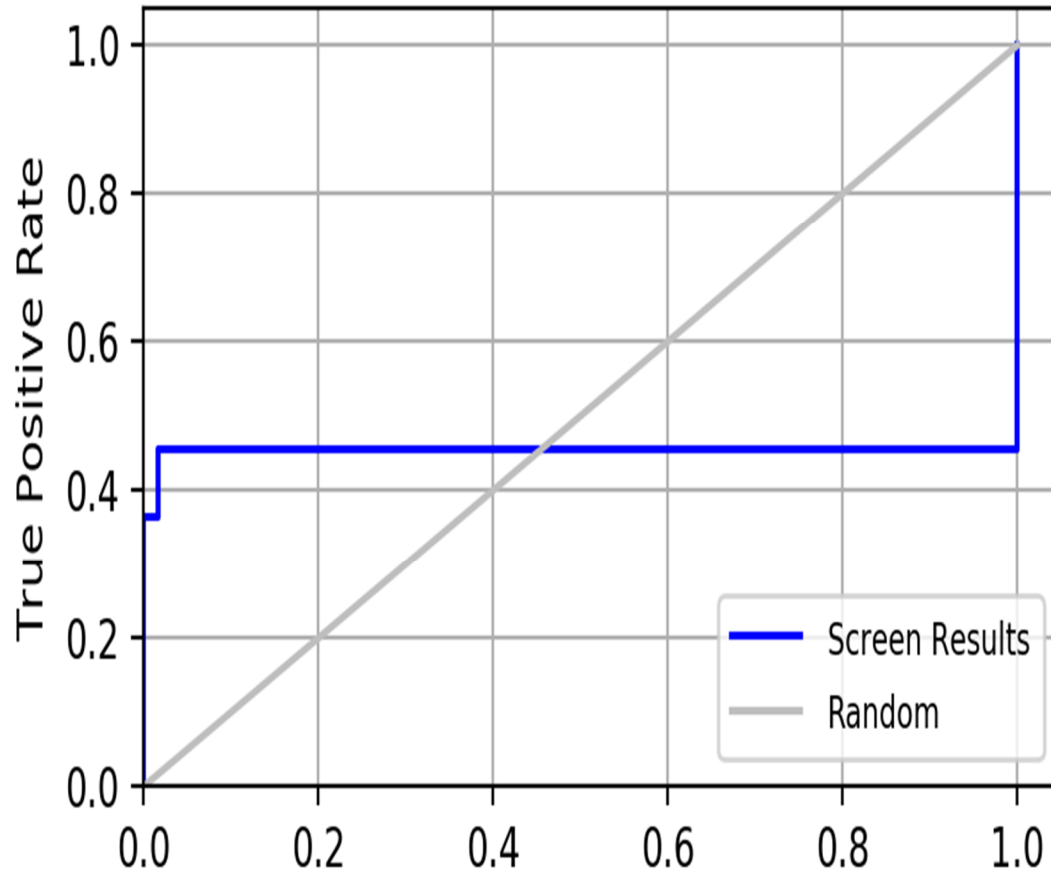

Figure S4: ROC Plot between percent screen and true positive rate
